# Supplementary material
Source: PubMed Central journal article supplement (PMC2254933)
Supplement: plntcell_tpc.107.051862_1.pdf [file plntcell_tpc.107.051862_1.pdf]

Supplemental Data. Wen et al. (2008). *Arabidopsis* *UEV1D* promotes Lys63-linked polyubiquitination and is involved in DNA damage response

**Supplemental Table 1.** *Saccharomyces cerevisiae* strains

| Strain    | Genotype                                                                                                          | Source      |
|-----------|-------------------------------------------------------------------------------------------------------------------|-------------|
| PJ69-4A   | <i>MATa trp1-901 leu2-3,112 ura3-52 his3-200 gal4Δ gal80Δ</i><br><i>Met2::GAL7-lacZ LYS2::GAL1-HIS3 GAL2-ADE2</i> | P. James    |
| HK580-10D | <i>MATα ade2-1 can1-100 his3-11,15 leu2-3,112 trp1-1 ura3-1</i>                                                   | H. Klein    |
| WXY942    | HK580-10D with <i>mms2Δ::HIS3</i>                                                                                 | Lab stock   |
| WXY955    | HK580-10D with <i>mms2Δ::HIS3 ubc13Δ::hisG-URA3-hisG</i>                                                          | This study  |
| DBY747    | <i>MATa his3-1 leu2-3,112 trp1-289 ura3-52</i>                                                                    | D. Botstein |
| WXY642    | DBY747 with <i>mms2Δ::HIS3</i>                                                                                    | Lab stock   |

**Supplemental Table 2.** Oligonucleotide sequences

---

| <b>Primer</b> | <b>Sequence</b>                                 |
|---------------|-------------------------------------------------|
| UEV1A-1       | 5'-ccc <u>gtcgaca</u> ATGAGTTCGGAGGAAGCCAAG-3'  |
| UEV1A-2       | 5'-ccc <u>gtcgac</u> TCACATCACACAACATTTAGC-3'   |
| UEV1B-1       | 5'-ccc <u>gtcgaca</u> ATGGGTTCGGAAGAAGAGAAG-3'  |
| UEV1B-2       | 5'-ccc <u>gtcgac</u> TCACATCACGCAACATTTACCAC-3' |
| UEV1C-1       | 5'-ccc <u>gtcgaca</u> ATGACTCTTGGCTCAGGATCG-3'  |
| UEV1C-2       | 5'-ccc <u>gtcgac</u> TTAGAAGAAAGTTCCTTCGGG-3'   |
| UEV1D-1       | 5'-ccc <u>gtcgaca</u> ATGACTCTTGGCTCAGGAGG-3'   |
| UEV1D-2       | 5'-ccc <u>gtcgac</u> CTAGAAGCAAGTACCTTCCGG-3'   |
| UBQ11-1       | 5'-CAGATTTTTGTTAAAACCCTA-3'                     |
| UBQ11-2       | 5'-CTTCTGAATGTTGTAATCC-3'                       |
| LB1           | 5'-GCGTGGACCGCTTGCTGCAACT-3'                    |
| 4g33380-F     | 5'-ATGAGAAGCTGGAGGAAGC-3'                       |
| 4g33380-R     | 5'-TCAAGCCGTTACAACACC-3'                        |

---

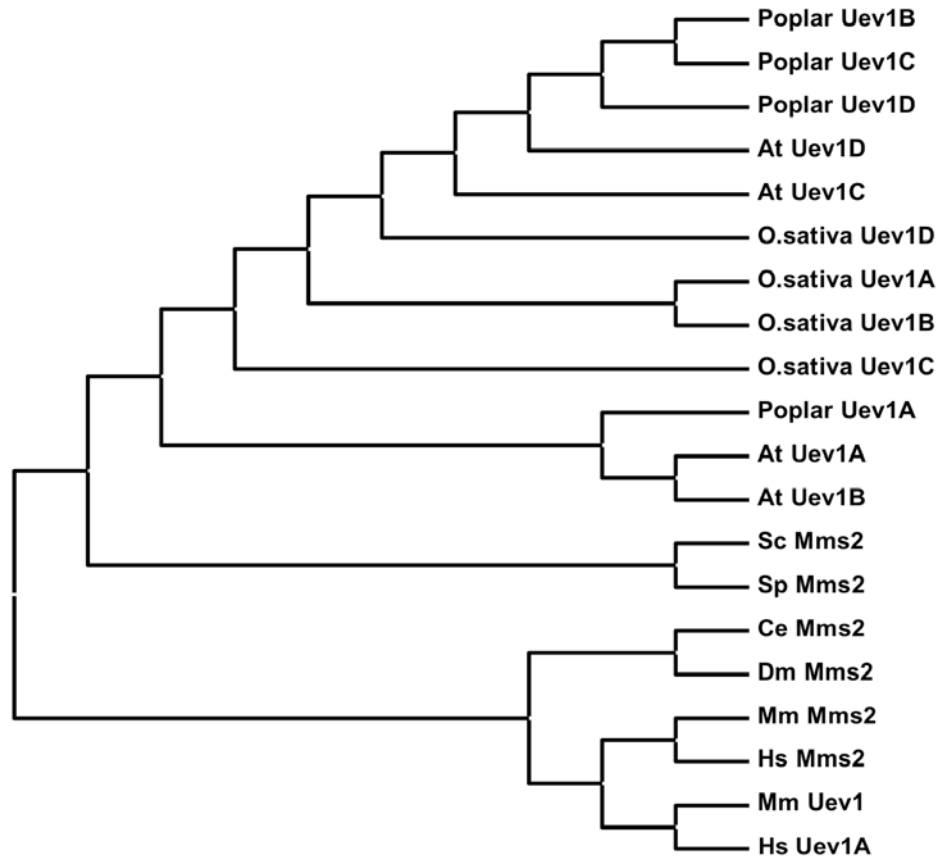

**Supplemental Figure 1. Phylogenetic analyses of hypothetical Uev family proteins from different organisms.**

The similarity clustering was conducted by using MEGA version 3 (Kumar et al., 2004). High similarity is indicated by the short branch length between any two sequences. Source of sequences: *O. sativa* Uev1 - NP\_001062804, Uev2 - NP\_001067224, Uev3 - NP\_001051063 and Uev4 - NP\_001062804. Poplar (*Populus trichocarpa*) Uev1 - CX655441, Uev2 - AJ767274, Uev3 - DT525203 and Uev4 - BU894366. The above gene names are arbitrary for the purpose of comparison only.

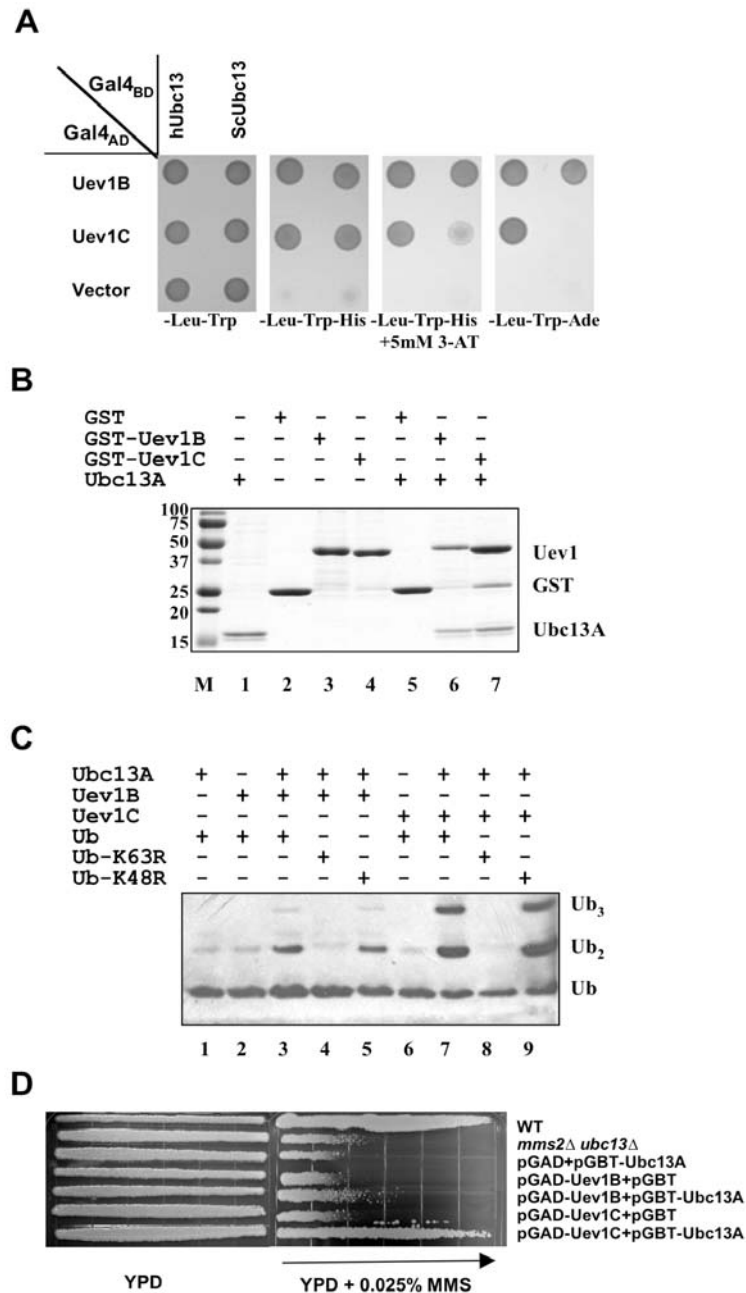

### Supplemental Figure 2. Characterization of Arabidopsis *UEV1B* and *UEV1C*.

(A) Physical interactions between Uev1B/C and Ubc13s from yeast or human in a yeast two-hybrid assay. Experimental conditions were as in Figure 2A. (B) Protein interactions between Uev1B/C and Ubc13 by an affinity pull-down assay. Experimental conditions were as in Figure 2C. (C) Ubiquitin conjugation by Ubc13 and Uev1B/C. Experimental conditions were as described in Figure 2D. (D) Complementation of the *mms2 ubc13* double mutant by *UEV1B/C* and *UBC13*. Experimental conditions were as in Figure 3B.

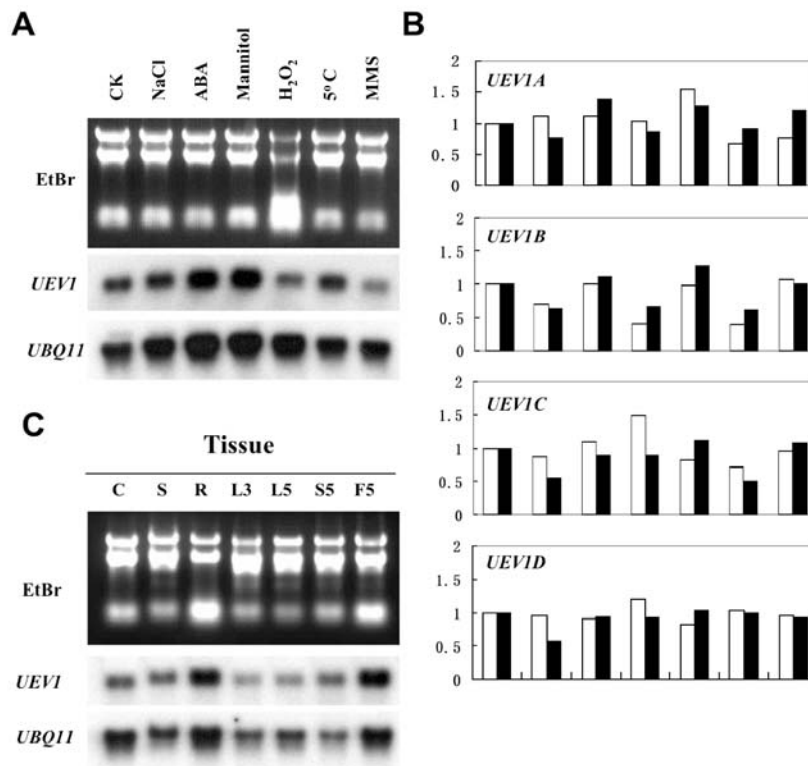

### Supplemental Figure 3. *UEVI* expression profiles.

(A) Northern hybridization measuring *UEVI* transcript levels from cell suspension culture under 24-h stress. Each lane contains 15  $\mu\text{g}$  of total RNA from different samples. The treatments were: CK, control; NaCl, 300 mM; ABA, 20  $\mu\text{M}$  (+)-abscisic acid; mannitol, 400 mM; H<sub>2</sub>O<sub>2</sub>, 20 mM; 5 °C, low temperature; and MMS, 0.01%. Abnormal rRNA profile after H<sub>2</sub>O<sub>2</sub> treatment was repeatedly observed (Wen et al., 2006). (B) Graphic presentation of data extracted from microarray analyses in [www.arabidopsis.org](http://www.arabidopsis.org) and expressed as relative levels to the untreated control. Tissue sources (except ABA): open bars, shoots; solid bars, roots. The conditions for the treatments and source of information (TAIR accession No.) were: NaCl, 150 mM (1007966888); ABA, 10  $\mu\text{M}$  (1007964750); mannitol, 300 mM (1007966835) for osmotic stress; methyl viologen, 10  $\mu\text{M}$  (1007966941) for oxidative stress; 5 °C (1007966553) for cold stress; and bleomycin (1.5  $\mu\text{g}/\text{ml}$ ) plus mitomycin (22  $\mu\text{g}/\text{ml}$ ) (1007966782) for genotoxic treatment. All treatments were for 24 h except for ABA treatments, which were seedlings treated for 1 h (open bars) and 3 h (solid bars). (C) Measuring *UEVI* transcript levels from different tissues by Northern hybridization. Each lane contains 20  $\mu\text{g}$  of total RNA from different tissues: C, cell suspension culture; S, shoot of 13-day seedlings; R, root of 13-day seedlings; L3, leaves of 3-week plants; L5, leaves of 5-week plants; S5, stems of 5-week plants; and F5, floral tissues of 5-week plants.

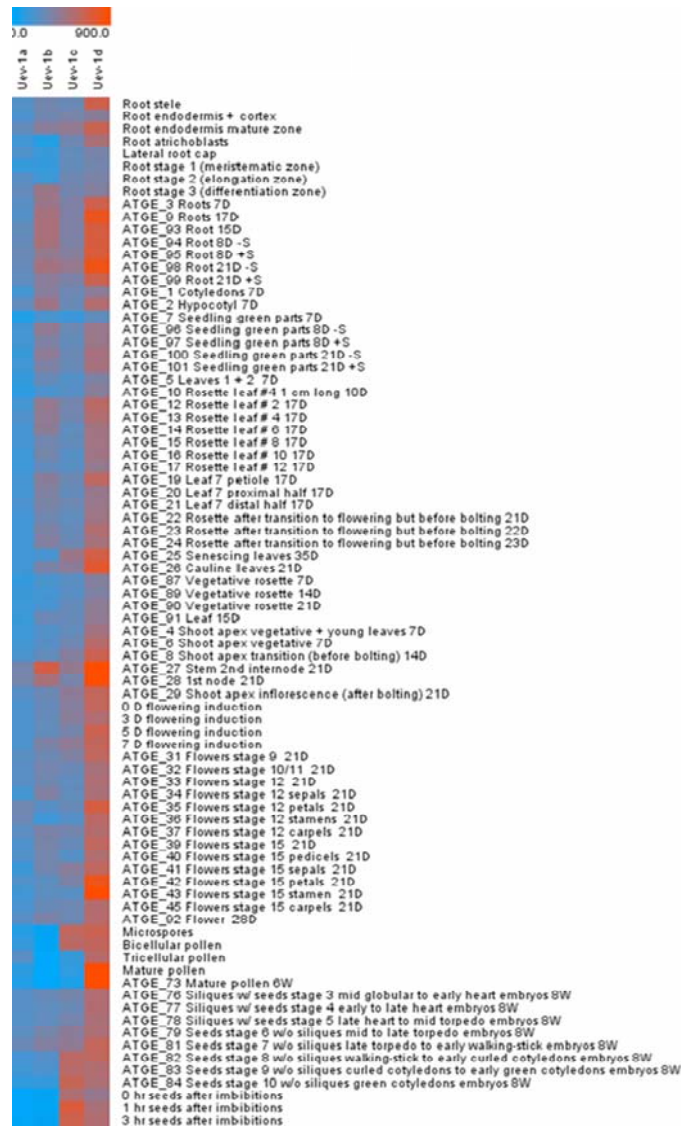

**Supplemental Figure 4. Heat map showing the transcript levels of Arabidopsis *UEVI* genes in different tissues and developmental stages.**

The expression of *UEVI* genes is shown in a colored representation with red and blue for high and low levels of expression, respectively. Note that *UEVID* expression in most databases is higher than that of the other three *UEVI* genes.

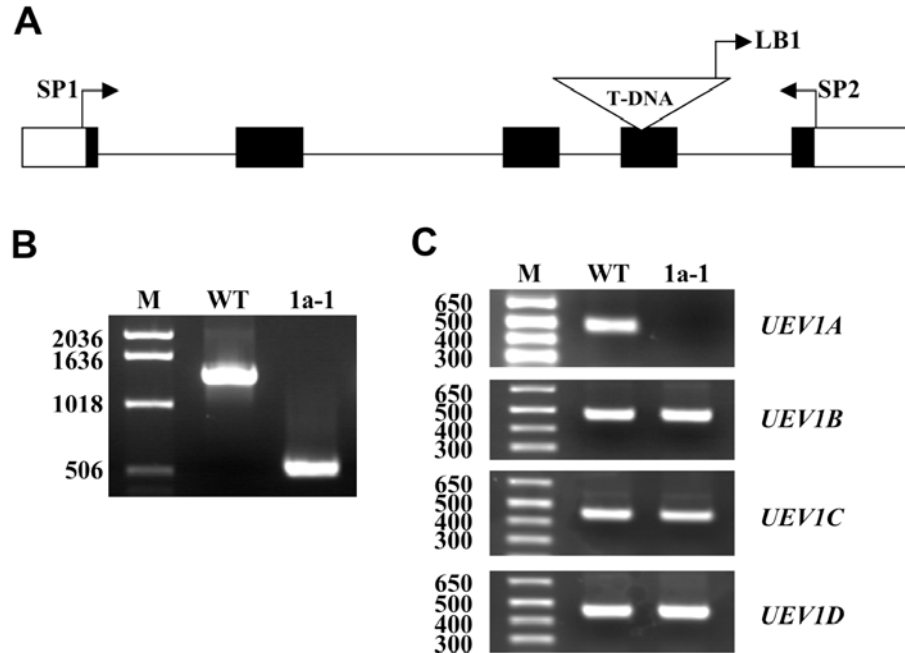

**Supplemental Figure 5. Confirmation of the *uev1a-1* T-DNA insertion mutant.**

(A) Genomic structure showing the position of T-DNA insertion in *UEVIA*. Boxes represent exons, solid boxes represent *UEVIA* ORF and lines represents introns. SP1, 5' gene-specific primer UEV1A-1; SP2: 3' gene-specific primer UEV1A-2; LB1, T-DNA left border primer. (B) Genomic DNA PCR to confirm *uev1a-1*. The fragment was amplified by using three primers (SP1, SP2 and LB1) in each reaction and genomic DNA from WS-4 (WT) or *uev1a-1* (1a-1) as a template. (C) RT-PCR detecting each of the *UEVI* transcripts. *UEVI* gene specific primers were used for an RT-PCR reaction against total RNA extracted from WS-4 (WT) and *uev1a-1* (1a-1) lines.
